# Supplementary material for: CpG location and methylation level are crucial factors for the early detection of oral squamous cell carcinoma in brushing samples using bisulfite sequencing of a 13-gene panel
Source: PubMed Central journal article supplement (PMC5558660; doi:10.1186/s13148-017-0386-7), 2017-08-15
Supplement: 13148_2017_386_MOESM1_ESM.pdf [file 13148_2017_386_MOESM1_ESM.pdf]

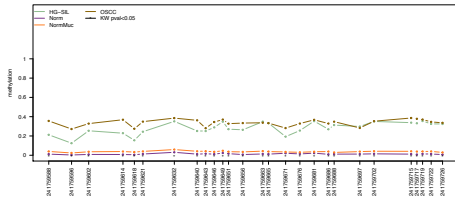

**KIF1A**

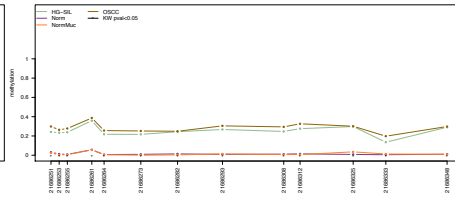

**PAX1**

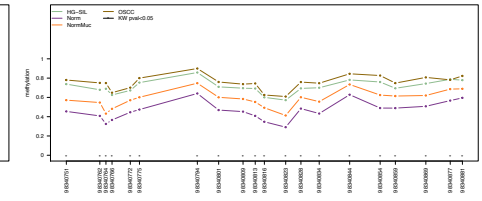

**ZAP70**

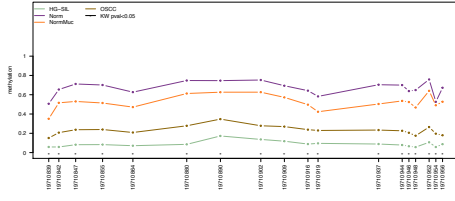

**GP1BB**

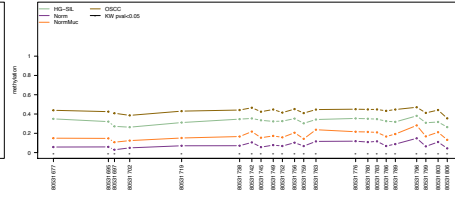

**LRRTM1**

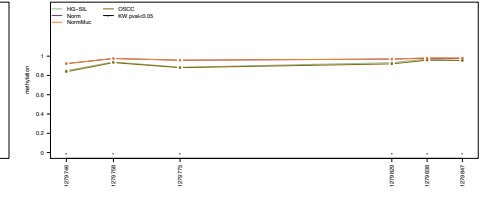

**TERT**

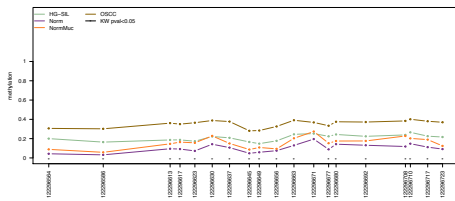

**PARP15**

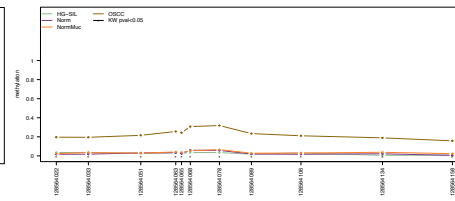

**FLI1**

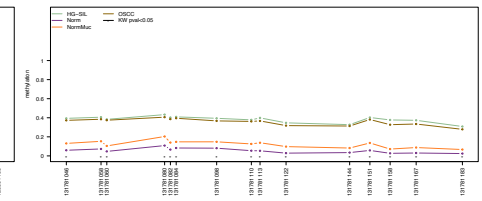

**NTM**

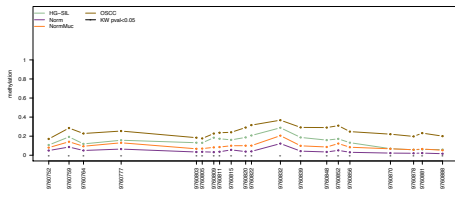

**LINC0059**

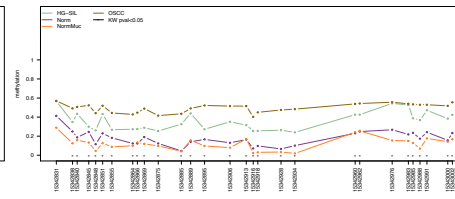

**EPHX3**

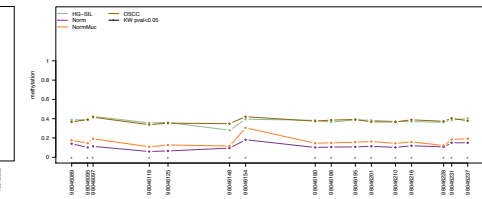

**MIR137**

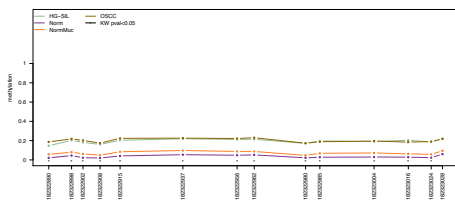

**ITGA4**

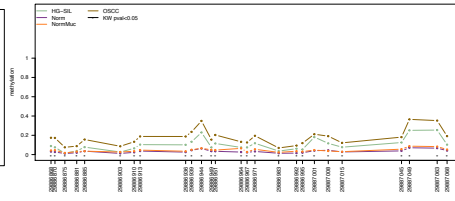

**MIR193**

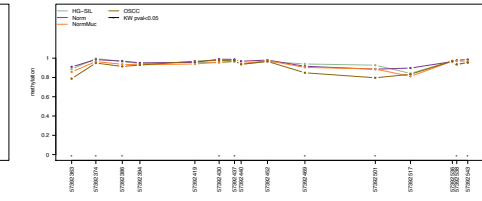

**MIR296**

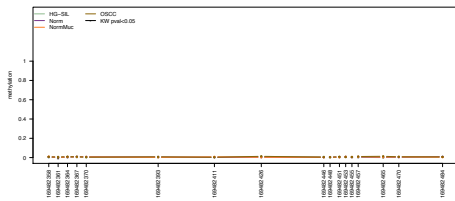

**TERC**

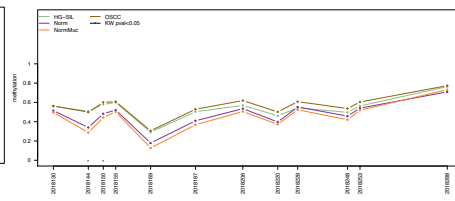

**H19**

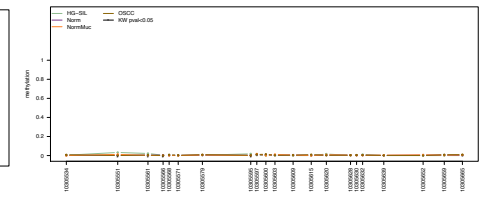

**DNMT1**
