# Supplementary material for: CpG location and methylation level are crucial factors for the early detection of oral squamous cell carcinoma in brushing samples using bisulfite sequencing of a 13-gene panel
Source: PubMed Central journal article supplement (PMC5558660; doi:10.1186/s13148-017-0386-7), 2017-08-15

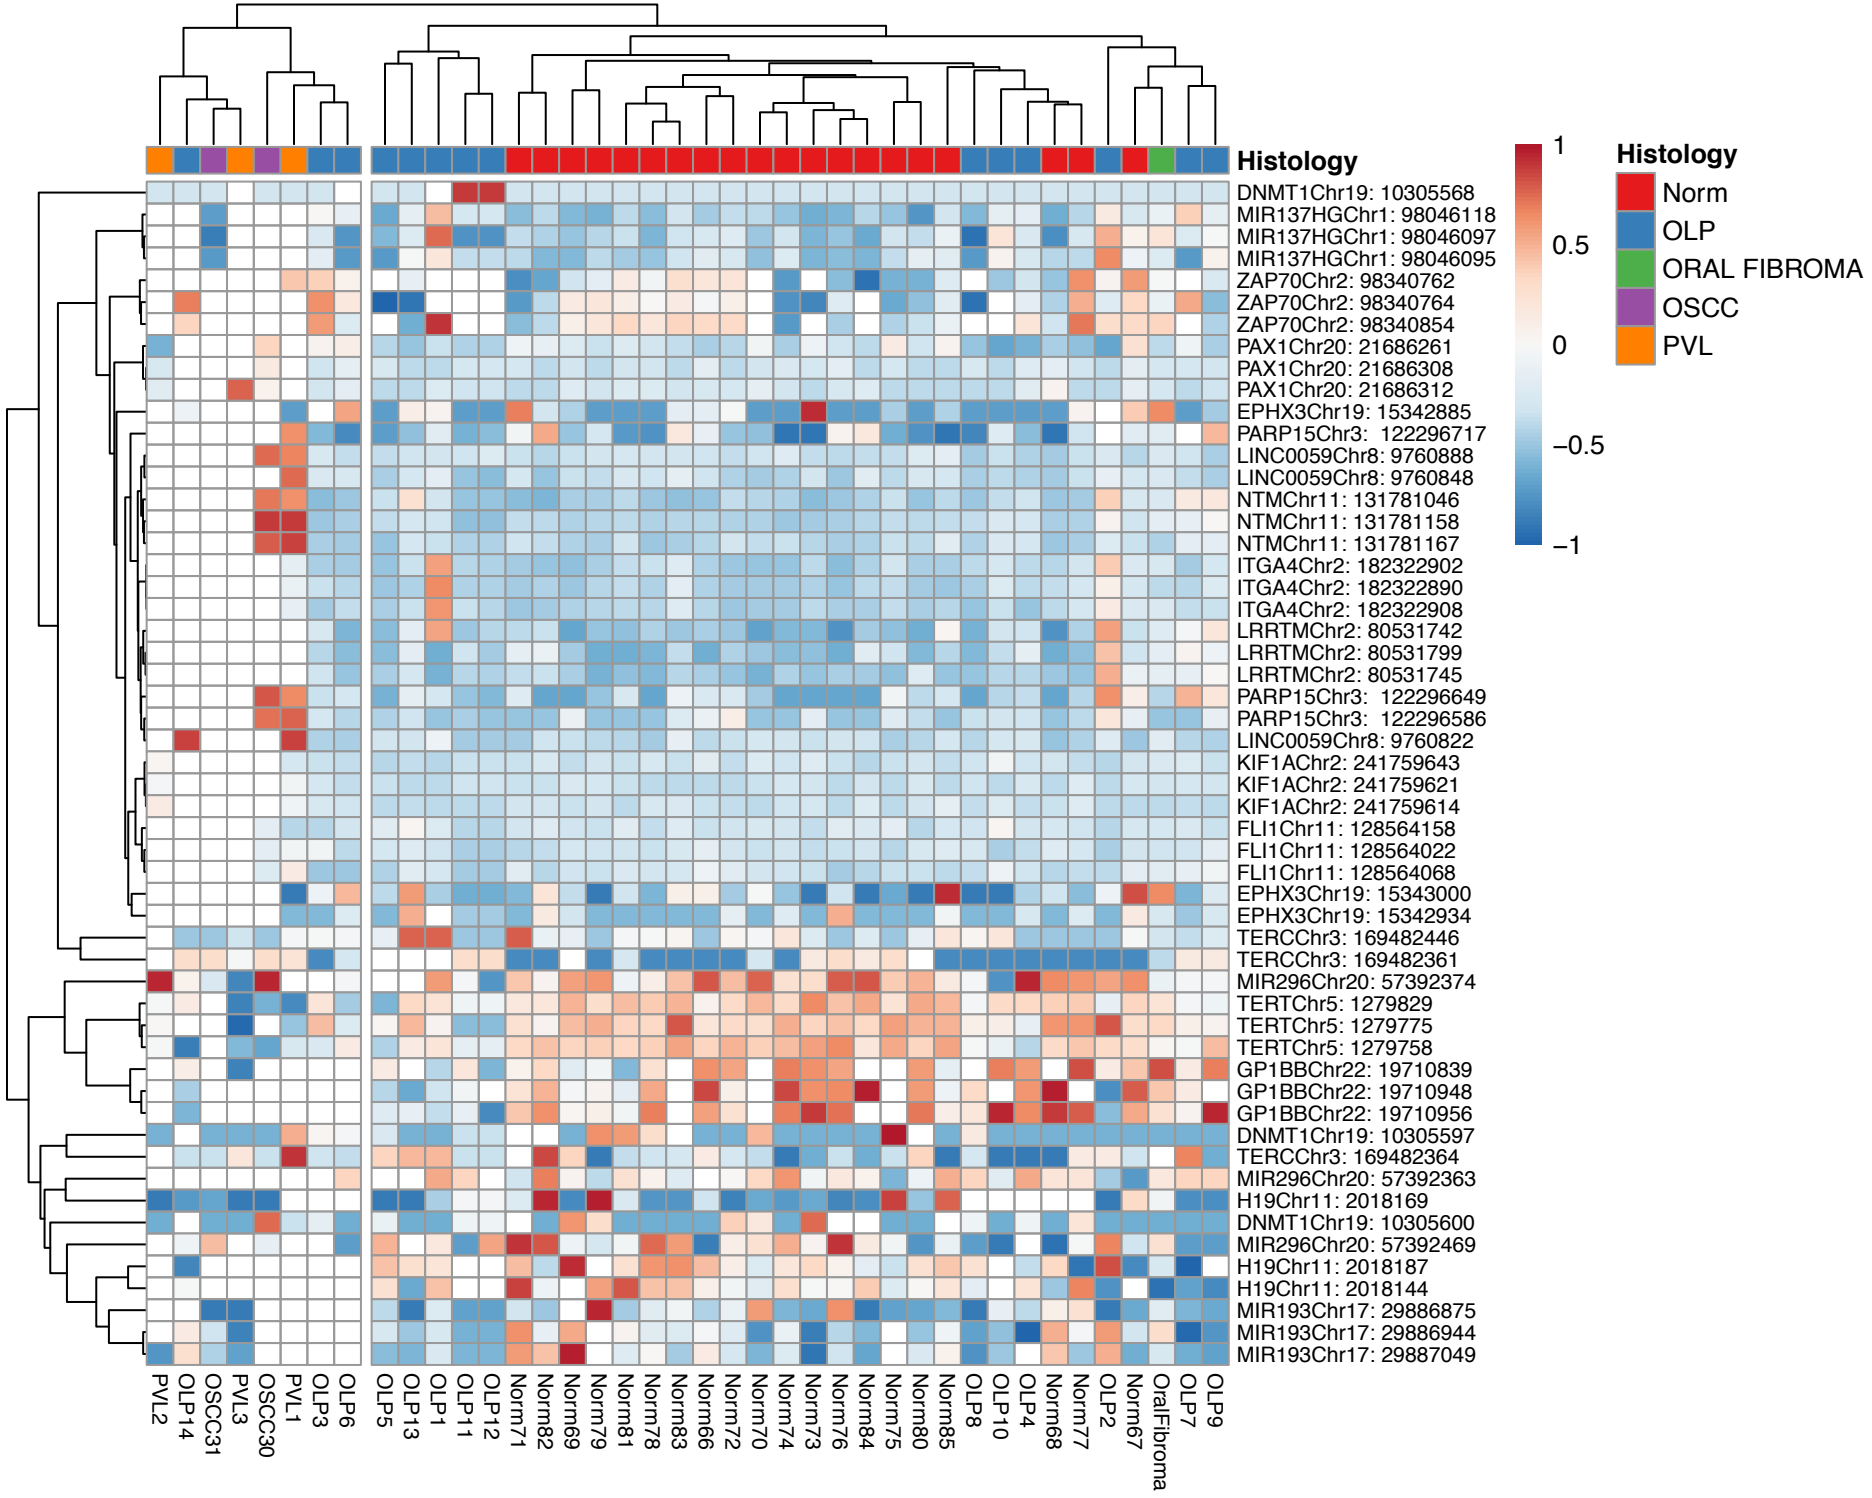

Supplement: 13148_2017_386_MOESM7_ESM.pdf [file 13148_2017_386_MOESM7_ESM.pdf]
